# Supplementary material for: Destruction of Lysozyme Amyloid Fibrils Induced by Magnetoferritin and Reconstructed Ferritin
Source: MDPI journal article supplement (doi:10.3390/ijms232213926), 2022-11-11
Supplement: s1 [file s1]

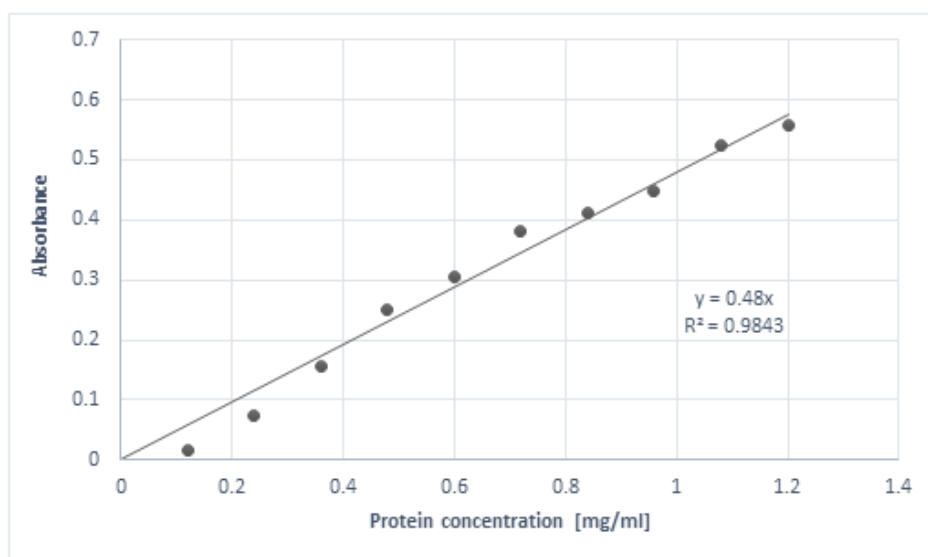

**Figure S1a.** Calibration curve for determination of protein concentration using Bradford assay.

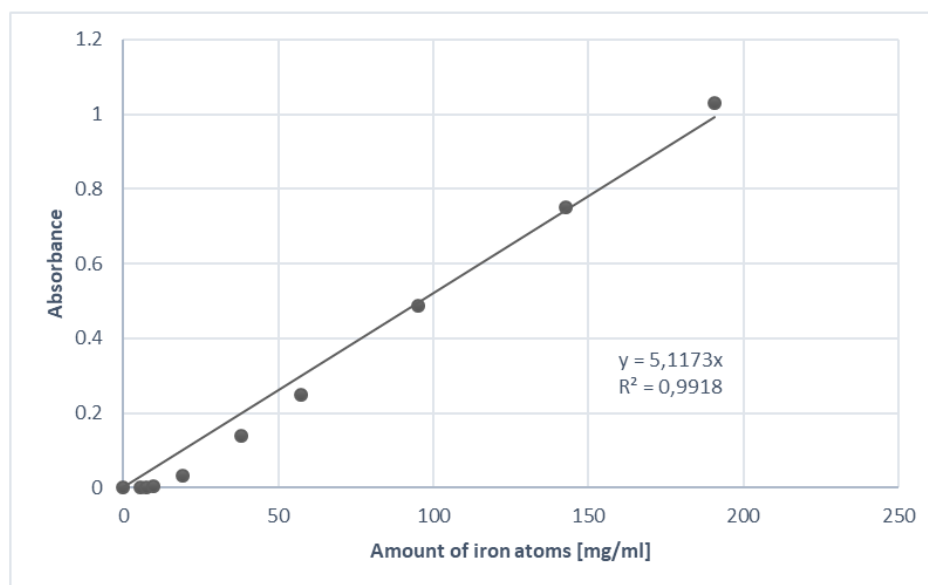

**Figure S1b.** Calibration curve for determination of the number of iron atoms.

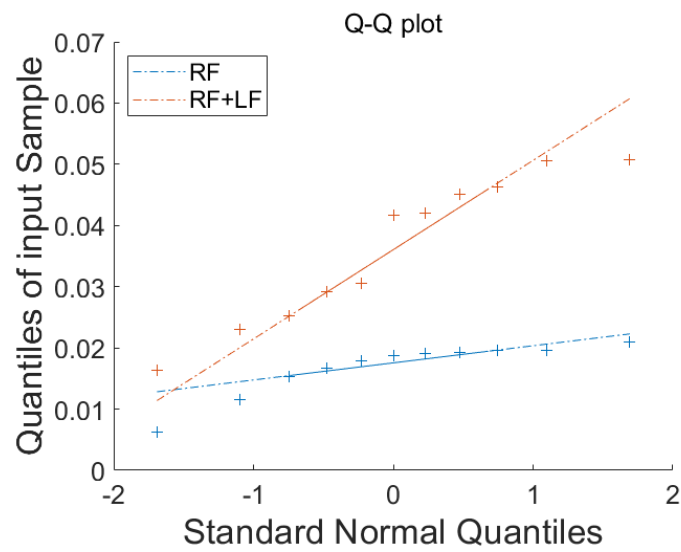

**Figure S2a.** Q-Q plot of iron release from reconstructed ferritin after interaction with lysozyme amyloid fibrils.

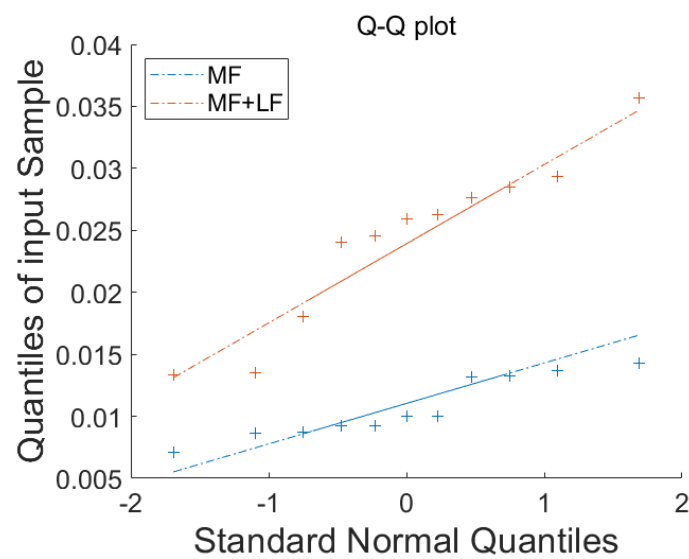

**Figure S2b.** Q-Q plot of iron release from magnetoferritin after interaction with lysozyme amyloid fibrils.

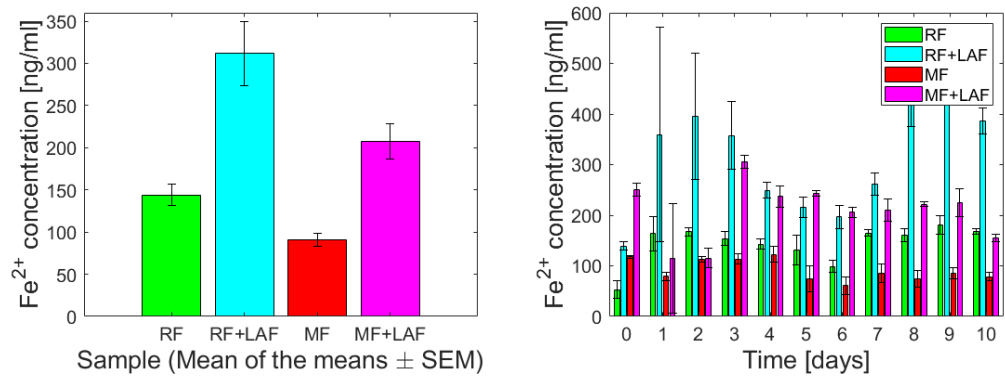

**Figure S3.** (LEFT) Daily release of ferrous ions (mean  $\pm$  SD) from ferritin's derivatives. (RIGHT) Average (mean of the means  $\pm$  SEM) of overall released ferrous ions from ferritin's derivatives per day.

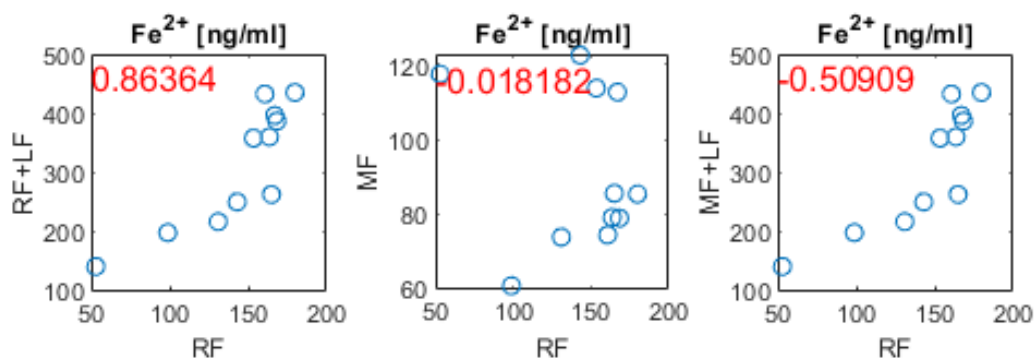

**Figure S4a.** Spearman correlation of iron release from ferritin derivatives and after their interaction with lysozyme amyloid fibrils.

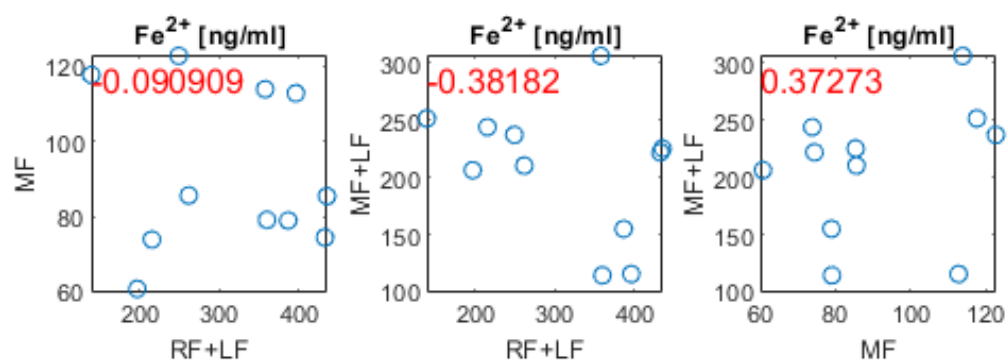

**Figure S4b.** Spearman correlation of iron release from ferritin derivatives and after their interaction with lysozyme amyloid fibrils.

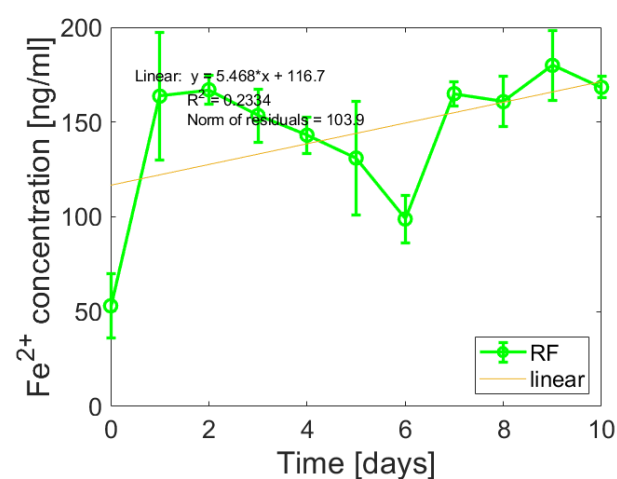

**Figure S5a.** Regression analysis of iron release from reconstructed ferritin.

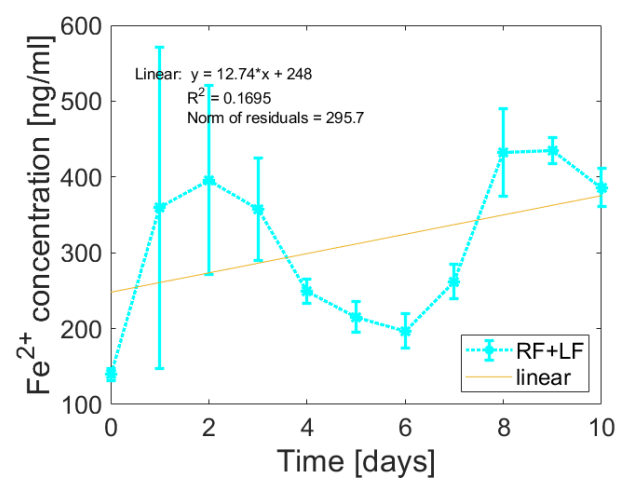

**Figure S5b.** Regression analysis of iron release from reconstructed ferritin after interaction with lysozyme amyloid fibrils.

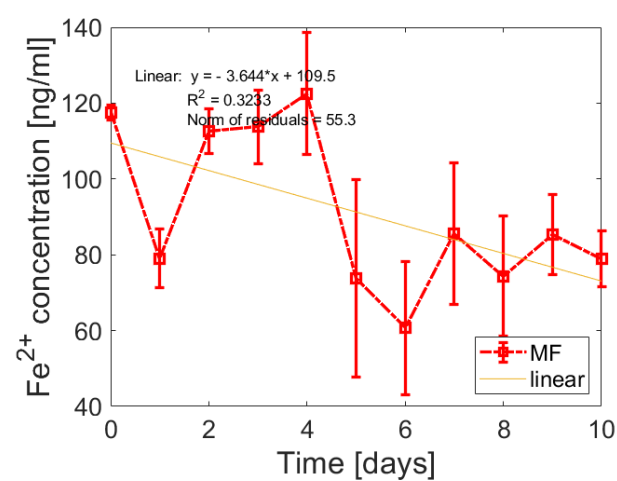

**Figure S5c.** Regression analysis of iron release from magnetoferritin.

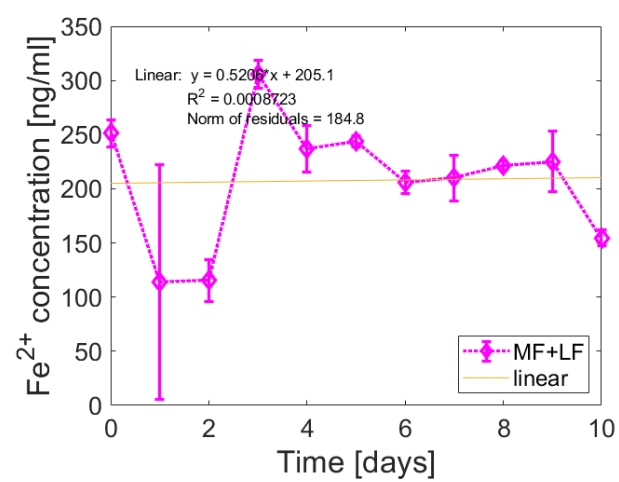

**Figure S5d.** Regression analysis of iron release from magnetoferritin after interaction with lysozyme amyloid fibrils.
